# Supplementary material
Source: Springer Nature journal article supplement (https://www.springermedizin.de/resource/supplementary/12943_2010_788_MOESM4_ESM.pdf/9554824)

A)

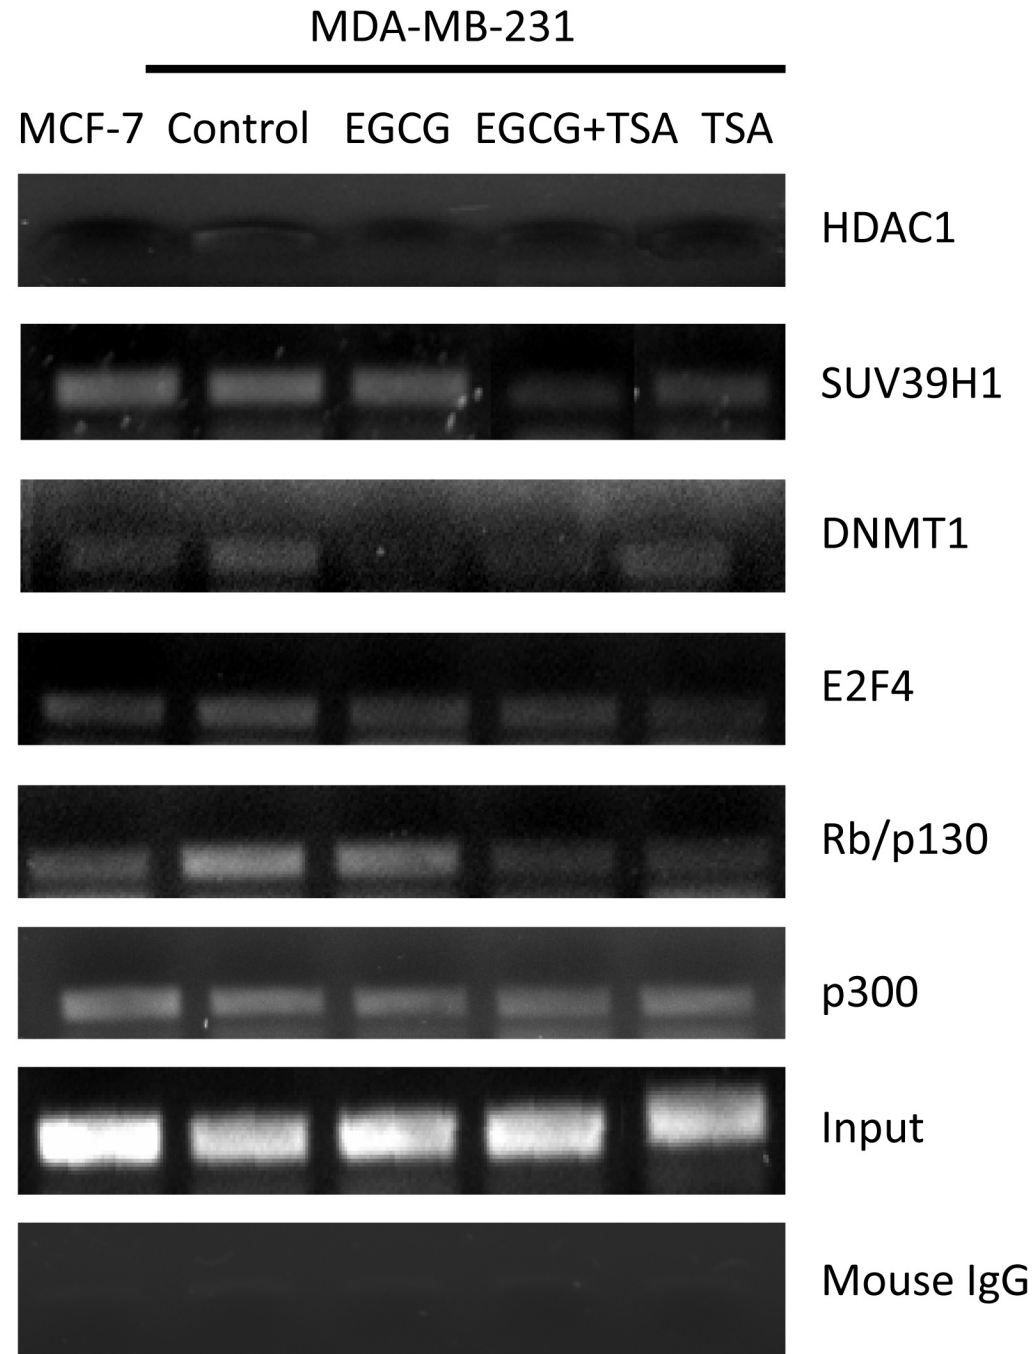

B)

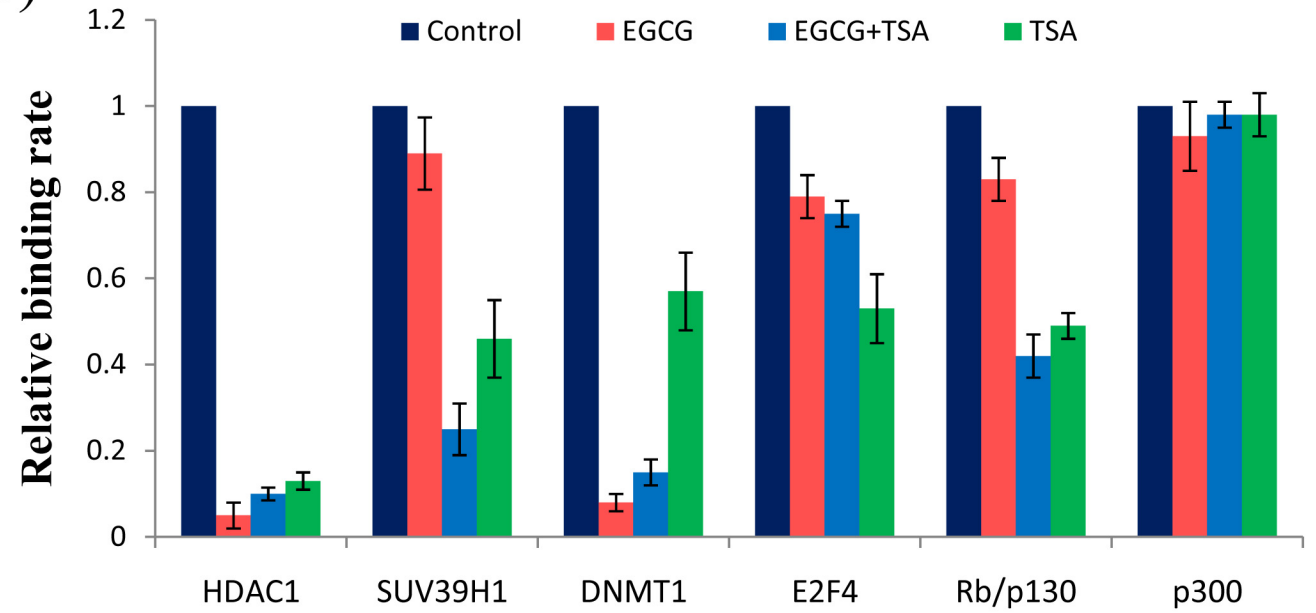

C)

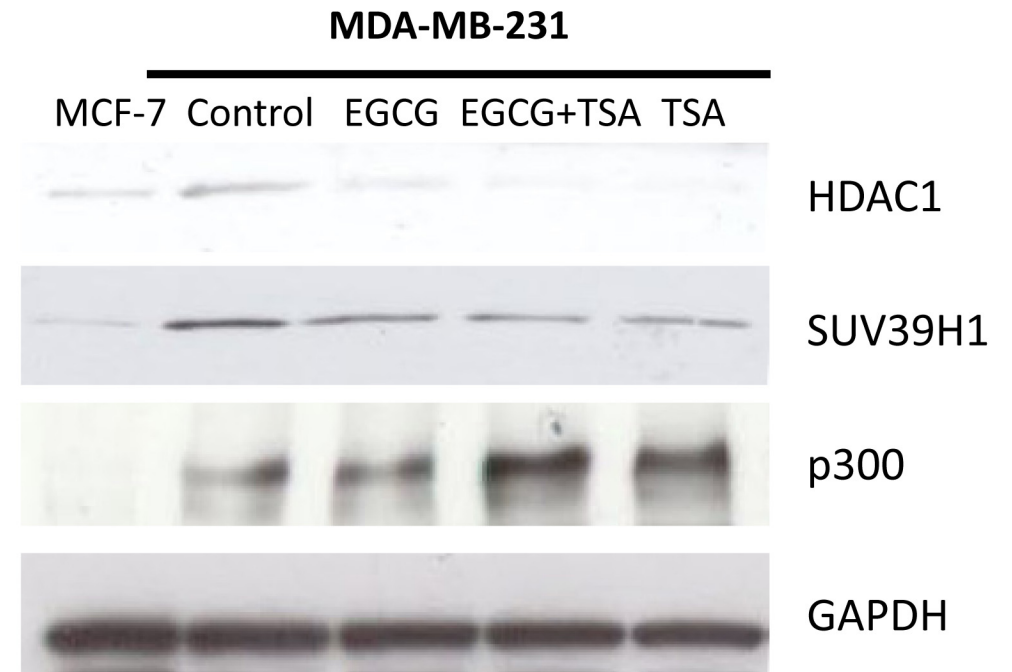

Supplement: MOESM4 [file 9554824]
